# Supplementary material
Source: Research Square preprint supplement (doi:10.21203/rs.3.rs-9880066/v1)
Supplement: Supplementary file 1 [file 0e51bcb6abf41f772c887767.docx]

Supplementary File IV- Table 3: Evidence Summary on Impact of PFHIS on Quality-of-Care Framework

| **Sr.**  **No** | **Author** | **State** | **Aim** | **Study type** | **Data Source** | **Sample size** | **Public Health Financing Scheme/Program** | **Outcomes in terms of Domain of Quality Addressed** | | | | | | |
| --- | --- | --- | --- | --- | --- | --- | --- | --- | --- | --- | --- | --- | --- | --- |
| **Timely Access** | **Effectiveness** | **Safety** | **Patient Centredness** | **Efficiency** | **Equity** |
| 1 | Sabharwal NS, Mishra V K, Naik et al. 2014 [19] | Uttar Pradesh Maharashtra | To assess the impact of RSBY on access, financial protection, and equity among socially excluded households. | Quasi Experimental Study | Primary survey | 1,500 households in total: (1,050 beneficiary households (70%)); 450 non-beneficiary households (30%)). | RSBY | Study found that OOPE and long travel distances to empanelled hospitals impacted ability for beneficiaries to obtain timely access to care. | Not Mentioned | Not Mentioned | Most beneficiaries reported smooth enrolment; some faced repeated registration and informal payments. | Reduced inpatient expenditure among cardholders.  However, it was also noticed that 40% of the RSBY smart card holders have not used the insurance scheme because of lack of awareness, long distance to hospitals, denial of treatment, and discouragement to use smart card. | Out of pocket expenditure was more in case of Scheduled Caste and Muslim groups. Also, transport cost for these groups were not reimbursed on time. Further, 38% of SC beneficiaries and around 31% of Muslim beneficiaries did not get treatment in their choice of hospital, compared to 14% of upper caste households. |
| 2 | Sood N, Bendavid E, Mukherji A, Wagner Z, Nagpal S, et al 2014 [20] | Karnataka | To evaluate the effect of a tertiary-care insurance scheme on utilization, mortality, and OOPE expenditure. | Quasi-experimental study (Geographic regression discontinuity study) | Vajpayee Arogyashree scheme data | Not mentioned | Vajpayee Arogyashree | Increased utilization of tertiary care facilities among eligible population | Study found that the use of tertiary care facilitates was higher among insured households and that mortality due to cardiac conditions and cancer was lower in insured patients demonstrating that participation in insurance schemes improves likelihood of receiving effective care. | Lower mortality for cardiac and cancer conditions (0.32%) among insured than uninsured patients (0.9%) | Not Mentioned | Eligible households had significantly reduced out-of-pocket health expenditures (64%) for admissions to hospitals with tertiary care facilities | Not Mentioned |
| 3 | Dhanaraj. 2014 [21] | Andhra Pradesh  Telangana | To examine whether state health insurance mitigates household economic vulnerability due to health shocks. | Cross-sectional study | Households from Selected Sentinel Sites of Andhra Pradesh regions: Telangana, Rayalaseema and Coastal Andhra | Not mentioned | Rajiv Arogyasri (RAS) public health insurance scheme in 2007 | Not Mentioned | Scheme focused narrowly on high-cost procedures, excluding common diseases. It does not cover diseases like tuberculosis, infectious diseases, malaria, filaria, gastroenteritis and jaundice. | Not Mentioned | The physical proximity to the hospital was also the main reason for underutilization of services. | Higher OOPE as scheme did not cover OPD and medication costs. | Automatic enrolment of BPL households, but underutilization among SC and Muslim groups. Districts with poor health infrastructure lacked the access to hospitals |
| 4 | Thakur, H. 2016 [22] | Maharashtra | To assess awareness, enrolment, and utilisation of RSBY and identify determinants of exclusion. | Cross-sectional Study | Primary | 6000 HHs across 22 districts | RSBY | Not Mentioned | Not mentioned | Not Mentioned | Not mentioned. | The utilization of the benefits and services from RSBY was very poor even among the enrolled population. It was 0.6% in a 1-year period. This was majorly due to unawareness among the vulnerable population. RSBY was launched with good intention, but it lacked good planning and implementation. | Majority of the participants are from the rural area (63.6% HHs and 62.3% individuals). The awareness was lower in urban areas as compared to rural areas. For RSBY enrolment government authorities used old BPL list which led to non-inclusion of many BPL families. The RSBY scheme was suddenly discontinued in Maharashtra because of a state insurance scheme, but both had differentiating feature as RSBY focused on secondary care while RGJAY focused on tertiary treatment. The participants felt that such schemes does not reach the intended population because of illiteracy, greed, poor planning, improper implementation, neglect of vulnerable population and existence of nexus of greed, corruption and political power. Variations in geographical coverage, exclusion of vulnerable groups like SC, ST from creating awareness are other reasons for inequitable distribution in awareness of scheme. |
| 5 | Katyal A, Singh PV, Bergkvist S, Samarth A, Rao M 2015 [23] | Andhra Pradesh Maharashtra | To compare inpatient health-care expenditures and related behaviours in Andhra Pradesh (RAS) and Maharashtra (RSBY). | Retrospective, longitudinal, controlled quasi-experimental study |  | Not mentioned | RAS and RSBY | Participation of private sector in the Rajiv Aarogyasri scheme in Andhra Pradesh has improved the access to health care in the state. Increase use of private facility where 87% population in AP covered by RAS while 12% in MH covered under RSBY. The use of public facilities increased for nephrology in AP because of high end dialysis units established through PPP mode. | Not Mentioned | Not Mentioned | Not Mentioned | Increase in OOPE in both states- especially for nephrology treatment and cardiac care as patients were unaware that they are covered follow up care till 7 months. The increase is found in MP and MH while decrease OOPE in AP due to better implementation and awareness. | Reduced ALOS in AP than in MH because of faster admission and treatment protocol to RAS beneficiary. |
| 6 | Barnes K, Mukherji A, Mullen P, Sood N. 2016 [24] | Karnataka | To estimate the impact of social health insurance on financial risk for poor households in India, focusing on out-of-pocket costs and welfare effects | Cross-sectional study |  | Households from 272 villages in the northern administrative division and 300 villages in the southern administrative division of North Karnataka. | National Health Insurance Scheme (Rashtriya Swasthya Bima Yojana or RSBY; Chief Minister’s Comprehensive Health Insurance Scheme (CMCHIS) to the people who have annual income less than INR 72,000 in Tamil Nadu; Fair Price Medicine Shop in TN and Rajasthan in public mode while in West Bengal in PPP mode. | Not Mentioned | Not Mentioned | Not Mentioned | Not Mentioned | The scheme indirectly provided financial protection by lowering the incidents of borrowing. It was reported only by 20.7% of those who were insured, and the amount was INR 1199/- less than those who were uninsured. | The scheme targeted poor households and provided relief from financial stress of bearing out of pocket expenditure. |
| 7 | Philip NE, Kannan, S, & Sarma, SP. 2015 [25] | Kerala | To compare the socio-demographics, health care utilization pattern, and out-of-pocket (OOPE) expenses of 149 insured and 147 uninsured below-poverty-line households insured under the Comprehensive Health Insurance Scheme, Kerala, through a comparative cross-sectional study. | Cross-sectional Study | Primary data | 300 BPL households—150 insured and 150 uninsured | RSBY and CHIS | Not Mentioned | Not  Mentioned | Not Mentioned | Not Mentioned | The mean OOPE expenses for inpatient services among insured participants (INR 448.95) was significantly higher than that of the uninsured households (INR 159.93). Around 79% of the hospitalised households used one or more distress financing mechanisms such as unsecured loans, gold loans, sale of assets, assistance/gift, mortgage of assets, and mortgage of land to meet the expenses associated with hospitalization. 59.7% of the hospitalisations were not covered by the scheme. The utilisation of inpatient services was higher in insured as compared to uninsured while there was no difference in utilisation of outpatient services among insured and uninsured. | Even though CHIS has increased the utilization of health care services, it did not enrol the poorest households among BPL |
| 8 | Iyer V, Sidney K, Mehta R, Mavalankar D, De Costa A. 2017 [26] | Gujarat | To examine characteristics of private facilities participating in the Chiranjeevi Yojana (CY) PPP for institutional deliveries in Gujarat, and derive lessons for universal health coverage | Cross-sectional study |  | 90 eligible private facilities (40 CY participants, 50 non-participants) in three districts of Gujarat | Chiranjeevi Yojana (CY) | Not Mentioned | Private new obstetricians performed lesser caesarean surgeries, thus leading to practice of scientifically recommended procedures. The PPP was an effective way of proper utilisation of CY in Gujarat. | Not Mentioned | Not Mentioned | Not Mentioned | Not mentioned |
| 9 | Karan A, Yip W, & Mahal A. 2017 [27] | Uttar Pradesh, Chhattisgarh Kerala | To estimate the causal effects of RSBY on out-of-pocket expenditure. | Cross-sectional Study | Three waves (1999 to 2000, 2004 to 05, and 2011 to 12) of household-level data from nationally representative surveys of the National Sample Survey Organisation (NSSO) (N = 346,615) and district-level RSBY administrative data on enrolment. | 346,615 NSSO data and district-level RSBY administrative data on enrolment | RSBY | Not Mentioned | Not Mentioned | Not Mentioned | Not Mentioned | we find that the likelihood of incurring any out-of-pocket spending (inpatient and outpatient) rose by 30% due to RSBY and was statistically significant. Although out of pocket spending levels did not change, RSBY raised household non-medical spending by 5%. | There was no significant reduction in OOPE among the poor households. |
| 10 | Nandi S, Schneider H, Dixit P. 2017 [28] | Chhattisgarh | To examine enrolment, utilization (public and private) and out of pocket (OOPE) expenditure for the insured and uninsured, in Chhattisgarh. | Cross-sectional study |  | 6026 individuals | MSBY  RSBY ESIS  CGHS | Not Mentioned | Not Mentioned | Not Mentioned | Not Mentioned | The median OOPE was more in private hospitals as compared to public hospitals (INR 10,000/- as compared to INR 1200/- respectively) among the insured patients. This was 12 times less than uninsured patients. 35.5% of households faced catastrophic health expenditure due to hospitalisation. | Women, ST and poorest are more likely to use public hospitals. Whether through choice or availability, those with insurance coverage made greater use of services in the public sector, which catered to the more vulnerable groups. |
| 11 | Mahapatro, SR, Singh P, & Singh Y. 2017 [29] | Multiple states | To understand the impact of health insurance schemes on tackling the economic burden of out-of-pocket expenditure and its effectiveness in reducing economic inequalities in health care spending. | Cross-sectional study | NSSO data used for analysis | Not Mentioned | RSBY, Arogyasri, CGHS, ESIS, etc. | Not Mentioned | Not Mentioned | Not Mentioned | Not Mentioned | The OOPE was higher for private insurer holder as compared to public insurer holder. The average OOPE payment for private/other insurance holder was Rs.18510 during the last 365 days while it was Rs 12408 for Public funded insurance schemes and Rs.15647 for those who were uninsured. | The poorest class (Q1) under Government Insurance scheme incurred around one-fifth (19%) of their household budget for meeting hospitalisation expenditure which was significantly more than the richest (9.4%) Among uninsured belong to poorest quintile, 21% of household expenditure allocated for inpatient care while the richest class spends 13.5% of their household income. One of the striking findings is that among social groups, a higher share of Scheduled Tribes (18.24%) was covered by government health insurance schemes than OBC (13.6%), Others (9.59%) and Scheduled Caste (13.11%). Health insurance schemes could not protect the large BPL population as the coverage was limited to only 9.55% indicating the limited success of the schemes in reaching to the target population. |
| 12 | Nandi S, Schneider H & Garg S. 2018 [30] | Chhattisgarh | To foster holistic understanding of the pathways of impact of PFHI schemes, including their role in promoting equity of access. | Cross-sectional study |  | RSBY and MSBY | Mukhyamantri Swasthya Bima Yojana (MSBY) | The unequal distribution of hospitals across the vulnerable districts leads to lesser utilization in highly vulnerable districts, thus limiting the timely access to healthcare services at the low vulnerable districts | One media report indicated that, over a period of just 8 months in 2012, private hospitals submitted claims for 1800 hysterectomies in Chhattisgarh, many of which were later deemed unwarranted. | Instances of moral hazard and provider-induced demand, have also been documented, including cases of unnecessary hysterectomies by the private sector under RSBY. One media report indicated that, over a period of just 8 months in 2012, private hospitals submitted claims for 1800 hysterectomies in Chhattisgarh, many of which were later deemed unwarranted. | Not Mentioned | Despite geographical patterns to vulnerability in Chhattisgarh state, availability of hospital services is inversely proportional to vulnerability demonstrating inefficient service planning. | Vulnerability increases with distance from the state’s centre towards the periphery. The highest vulnerability districts have the highest insurance coverage, but the lowest availability of empanelled hospitals (3.4 hospitals per 100,000 enrolled in HVDs, vs. 8.2 hospitals per 100,000 enrolled in LVDs). While public sector hospitals are distributed equally, the distribution of private hospitals across tertiles is highly unequal, with higher availability in LVDs. The number of claims (per 100,000 enrolled) in the HVDs is 3.5 times less than that in the LVDs. The availability of hospital services under the state-funded universal health insurance scheme in Chhattisgarh is unequal and inversely related to vulnerability and, thus, the need for these services. |
| 13 | Bose M, Dutta. 2018 [31] | Tamil Nadu, Rajasthan, West Bengal | To study how state financing strategies influence utilization of public healthcare facilities for treatment. | Cross-sectional study |  | 3917 households from TN, 2912 households in Rajasthan and 5019 households from WB. The corresponding sample households were 5139, 3383 and 5049 for TN, Rajasthan and WB respectively. (71st and 60th Round) | Free Medicine Scheme in all public hospitals and West Bengal (WB) has Fair Price Medicine Shop (FPMS) scheme, | Not Mentioned | Not Mentioned | Not Mentioned | Not Mentioned | Treatment cost in public hospitals was lowest in Rajasthan, followed by West Bengal, and highest in Tamil Nadu. The maximum subsidized cost was in Tamil Nadu (95%), followed by Rajasthan (16%) and West Bengal (9%). For private sector hospitalizations, out-of-pocket (OOPE) spending was lowest in West Bengal, followed by Tamil Nadu, and highest in Rajasthan. | The poorest benefit the most from the public healthcare facilities in the state of Tamil Nadu and Rajasthan while in West Bengal, the upper middle class utilize public health care facility to maximum. The poor in West Bengal do not utilise public healthcare facility because of high OOPE costs. The high OOPE among the poor in West Bengal is due to mismatch between the actual need and FPMG medicine list. Further the study shows geographic sector wise inequality in public sector utilization of services, where TN provides maximum subsidy for hospitalization and WB provides minimum. An inverse relation exists between the subsidy and utilisation. |
| 14 | Ranjan A, Dixit, P, Mukhopadhyay I, & Thiagarajan, S. 2018 [32] | Not Mentioned | To examine coverage and effectiveness of government purchasing through insurance and tax-funded free or subsidized care, their impact on catastrophic health expenditure from hospitalization, and associated equity issues. | Cross-sectional study |  | Total 65,932 households (rural: 36480, urban: 29452) including total 3, 33,104 individuals (rural: 189573, urban: 143531) | Public funded health insurance (PFHI) | Not Mentioned | Not Mentioned | Not Mentioned | Not Mentioned | Not Mentioned | The coverage of PFHIs is higher in urban areas as compared to rural areas (13.1% as compared to 12.0%). The insurance coverage is equal among both the gender. The study highlighted a contrasting finding, which showed that urban people utilised PFHIs more than the rural people. |
| 15 | Sinha, RK. 2018 [33] | Jharkhand | To assess whether RSBY improved care seeking, reduced catastrophic health expenditure and medical impoverishment, and achieved equitable benefits. | Cross-sectional study |  | 1,643 households below poverty line (BPL). | RSBY | The study found that resource poor households more frequently delay or forego treatment due to lack of affordability. | Not Mentioned | Not Mentioned | The study shows that RSBY did not achieve its objective of improving care-seeking, as it did not lead to increased in-facility treatment (hospitalization). Further, the scheme did not cover out-patient expenditure, one of the major contributors towards catastrophic health expenses. | The scheme increased the health expenditure and did not lead to any reduced OOPE among the ones with the card. The catastrophic health expenditure was reported to have increased in the poorer enrolled sections. | The scheme targeted poor households, but increased the health expenditure among them, leading to an increased financial burden. The catastrophic health expenditure was reported to have increased in the poorer enrolled sections as the scheme did not cover OPD care. |
| 16 | Khetrapal S, & Acharya A. 2019 [34] | Punjab & Haryana | To evaluate the expansion of healthcare coverage and its impact on healthcare access and quality. | Cross Sectional Study | Mixed Method Study | A total of 751 exit interviews of RSBY (387) and non-RSBY (364) participants, 399 participants were interviewed in Patiala and 352 in Yamunanagar | RSBY | Not Mentioned | Not Mentioned | Not Mentioned | Not Mentioned | It was found that RSBY beneficiaries had incurred OOPE expenditure of ₹5748 though it was lesser than for non-RSBY (₹10667) and less at public facilities when compared to private. Delayed reimbursement to providers. The beneficiaries were not provided with transportation costs and food costs. | The study revealed that the BPL population had low coverage under the scheme i.e. only 15% of exit interview participants, with small family enrolment, limited access to empanelled hospitals, and weak oversight, largely due to misaligned incentives, implementation gaps, and poor supervision. |
| 17 | Garg S, Chowdhury S, Sundararaman T. 2019 [35] | Andhra Pradesh, Karnataka and Tamil Nadu | To evaluate whether publicly funded health insurance (PFHI) improved hospital utilization and financial protection in three Southern Indian states. | Cross-sectional study | NSS data from 2004 and 2014 | 101,000 individuals across 3 states from NSS 60th & 71st rounds | PFHI | Not Mentioned | Not Mentioned | Not Mentioned | Not Mentioned | It founds that Despite higher coverage, PFHI schemes failed to improve hospital utilization or reduce out-of-pocket expenses. | The study mentioned that poorest households were more likely to incur catastrophic health expenditure indicating no significant improvement in financial protection for poor. The study reported that the impact of PFHI was poor for most vulnerable social groups of Scheduled Castes and  Scheduled Tribes. |
| 18 | Garg S, Bebarta KK, Tripathi N. 2020 [36] | Chhattisgarh | To evaluate the performance of PMJAY in improving access and financial protection for hospital care in Chhattisgarh. | Cross-sectional study | Primary survey (2019) + NSS data (2004, 2014) | 15,361 individuals in 2019; historical comparison with 6375 (2004) and 7651 (2014) from NSS | PM-JAY during its initial stages of implementation and other PHFIs existing before PM-JAY | Not Mentioned | Under PM-JAY, OOPE spending was higher for caesarean deliveries than for normal deliveries demonstrating the impact of out of pocket expenditure on the accessing evidence based care and treatment. | Not Mentioned | Not Mentioned | The study found that the PM-JAY scheme did not lead to increase the utilisation of public healthcare services. The OOPE was more in seeking services from private hospitals that the public hospitals. The CHE was also increased for private sector as compared to public sector and there was no difference in the CHE with respect to enrolled or not enrolled under PFHI. | Not Mentioned |
| 19 | Arora A, Bhutani, P, Chhabra, S, & Smith O. 2020 [37] | Madhya Pradesh, Uttar Pradesh, Bihar, Gujarat | To understand how PM-JAY’s national portability enables patients to seek care at any empanelled hospital across India. | Cross-sectional study |  | 68,669 cases with pre-authorisations out of 81,254 portability cases registered under PM-JAY | PM-JAY | The portability experience was rated as excellent by 90% of the beneficiaries, which enhances timely access to treatment. | Not Mentioned | Not Mentioned | The portability experience was reported as excellent or very good by 90% of respondents, as it led to increased used by them. | Not Mentioned | The study highlights that migrant workers account for a negligible percentage of portability cases. The study also highlighted scope for improvement including more women and include a geographic area. |
| 20 | Subramaniam S, Selvavinayagam TS. 2020 [38] | Tamil Nadu | To analyse inter-district disparities in hospital empanelment and service utilization under Tamil Nadu CMCHIS and its relation with district development indicators. | Cross-sectional study | CMCHIS and HDI data | 972 empanelled hospitals, 32 districts analyzed | Tamil Nadu’s Chief Minister’s Comprehensive Health Insurance Scheme (CMCHIS) | Not Mentioned | Not Mentioned | Not Mentioned | Not Mentioned | The study found that the disparity in hospitals availability between districts impacted utilization of the CMCHIS scheme. | The high developed districts had lower enrolment while it was seen higher in case of low developed districts. The number of empanelled hospitals was lesser in less developed districts as compared to high developed districts, thus leading to higher utilization rate in high developed districts as compared to less developed districts. |
| 21 | Sriram S, Khan MM. 2020 [39] | NA | To examine the effect of Public Health Insurance Programs for the Poor on hospitalizations and inpatient Out-of-Pocket costs. | Cross-sectional study | National Sample Survey Organization, Social Consumption in Health 2014 | 64,270 individuals below the poverty line (BPL) in India, derived from the National Sample Survey Organization (NSSO) 71st Round, 2014, | ESIS, CGHS, RSBY and other state health insurance programs for the poor. | Study found that limitations in health insurance coverage, for example maximum expenditure limits, resulted in poor access of outpatient services and overutilization of inpatient services. | There was no difference in hospitalization length with respect to Social group, religion, urban/rural location, household type, marital status, education, number of hospital beds in the state. It was same for individuals enrolled under PHFIs or not enrolled under PFHIs, indicating similar treatment practices, based on scientific principles. | Not Mentioned | Not Mentioned | The study showed that the OOPE for beneficiaries of PFHIs was affected by days of hospital stay, education and age of patient, using a private hospital for treatment, admission in a paying ward, and having some specific comorbidities. The length of hospitalization had no difference with respect to enrolment under PHFIs. | The utilization of healthcare services was more in poor people as they had better access to curative services because hospitals got incentive for inpatient admissions. The length of stay increased among the other socially backward groups as compared to Scheduled Tribes group but the access to healthcare services was less in tribal population as compared to other backward classes. |
| 22 | Mohpal, A, Smith, O, & Chhabra, S. 2020 [40] | Multiple states | To provide early evidence on unplanned readmissions and in-hospital mortality under PM-JAY as indicators of quality of care. | Cross-sectional study | PM-JAY claims data | 36.8 lakh beneficiaries and 59.6 lakh claims | PM-JAY | Not Mentioned | The in-hospital mortality was reported to be 0.58% since 2018 till 2019. The in-hospital mortality was higher in private sector with respect to neonatal care and higher in public sector with respect to neurosurgery cases. Further, the study reported the readmission rates to be 1 in 20 within 30 days of readmission and 1 in 50 within 7 days of readmission. The readmission rate varied from 1% to 11% across different states. It was higher in males and increased with patient age. These findings reveal concerns to focus on quality of care for PMJAY patients. | Findings include variable mortality rates across different specialities and variable 7 and 30 day readmission rates across states and for certain population cohorts indicating gaps in care safety. | Not Mentioned | The high readmission rate leads to increased financial burden and accounts to 3.4 to 4.9% of total spending, some of which can be reduced by ensuring quality of care. | Not Mentioned |
| 23 | Mishra PS, Kumar P, Srivastava S. 2021 [41] | India | To understand the JSY coverage at the district level in India | Cross-sectional study | National Family Health Survey data | 148,145 women aged 15–49 years who gave last birth in the institution during 5 years preceding the survey | JSY | Not Mention | It is well reflected in the EAGs states in terms of spatial inequality in service coverage. | Not Mentioned | Not Mentioned | The study found regional disparities in JSY coverage across districts of India with prior studies citing the unavailability of CHWs, lack of governance structures, and limited access to health-related information as contributors; an example of inefficient service planning. | The overall coverage of JSY in India is 36.4% and it highly varied across different regions, districts, and even socioeconomic groups. The spatial error model depicts that if in a district the women with no schooling status increase by 10% then the benefits of JSY get increased by 2.3%. Similarly, if in a district the women from poor wealth quintile, it increases by 10% the benefits of JSY also increased by 4.6%. |
| 24 | Joseph J, Sankar D H, Nambiar D. 2021 [42] | 30 Indian states and 06 UTs | To understand the public/private mix of hospital empanelment while also exploring patterns related to models of implementation, which vary across states. | Cross-sectional study | Primary | 20,257 hospitals empanelled as on March 2020 | PMJAY | The PMJAY improved access to health services as 71.8% of the empanelled hospitals have emergency care services, thus ensuring timely access to health services. The emergency care services cater to road traffic injuries which is among the top 15 cause of mortality. | Not Mentioned | Not Mentioned | Not Mentioned | Not Mentioned | Not Mentioned |
| 25 | Sriee GVPV, Maiya GR. 2021 [43] | Tamil Nadu | To estimate the coverage, utilization, and impact of Ayushman Bharat scheme in the rural field practice area of Saveetha Medical College and Hospital, Chennai. | Cross-sectional study |  | 300 households | PM-JAY | Not Mentioned | Not Mentioned | Not Mentioned | Not Mentioned | The scheme helps reduce unnecessary out-of-pocket spending for most insured households, while 39.88% of uninsured households still face financial burden. The additional expenditure is 10% among the insured individuals. | Higher coverage among lower classes (83.33% in lower class) and 63.83% were covered among the upper lower class. Uninsured households are more likely to experience financial hardship. |
| 26 | Trivedi M, Saxena A, Shroff Z, Sharma M. 2022 [44] | Madhya Pradesh & Gujarat | To understand PM-JAY beneficiaries’ experiences at empaneled hospitals: responsiveness, financial burden, and satisfaction with hospitalization. | Cross-sectional study |  | 200 (100 each) | PM-JAY | The prompt attention and timely services were higher in Gujarat as compared to Madhya Pradesh. These components were higher in public hospitals as compared to private hospitals in the selected two states. The time taken to authorise the pre-authorization request was same in public and private hospitals of Gujarat but it was lower in public hospitals as compared to private hospitals in Madhya Pradesh. Also, timely intervention at the help desk, claim processing, presence of medical/paramedical Arogya Maitris at the help desk improved the utilization. | Not Mentioned | Not Mentioned | The PM-JAY guidelines indicate that patients should receive information via calls and SMSs by the scheme authorities. Over half of the patients in Gujarat reported receiving SMS during the verification step, but far fewer received updates at pre-authorization, admission or discharge and Madhya Pradesh, reported even lower rates. The most commonly reported was a post discharge feedback call - 60% of Gujarat and 50% of MP beneficiaries received one, with 64% in Gujarat's public hospitals and 40% in MP. | beneficiaries are incurring out-of-pocket expenditure due to unavailable medicines and taking diagnostic tests from outside. The OOPE among the beneficiaries from MP was because of the reason that hospitals asked for lumpsum payment as the cost of treatment was higher than as mentioned or provided in PM-JAY package. WhatsApp and internal systems enhanced workflows by reducing patient movement and improved efficiency of the work. Lack of document prompts in TMS led to missed information; delayed or unclear insurer queries causing delay in claim settlement. One hospital in MP has developed a software to address this challenge and improve efficiency. Also, Arogya Mitras with Medical/Paramedical background leads to better operational efficiency. | The study reported high proportion of cases from socially backward backgrounds indicating a higher utilization among the socially backward sections of the society. |
| 27 | World Health Organization. 2022 [45] | NA | To evaluate the quality certification system and its implementation among empanelled hospitals under AB PM-JAY. | Cross-sectional Study | Mixed Method |  | PM-JAY | Not Mentioned | Accredited hospitals scored higher in adherence to standard treatment guidelines and clinical procedures. Full accredited hospitals served high end procedures as compared to entry level or non-accredited hospitals. | The patient satisfaction score was lower in full accredited hospitals as compared to entry level and non-accredited hospitals, but it was statistically insignificant. The full accredited hospitals had policies and processes such as those required for infection control, patient identification, medication safety, emergency codes, diagnostic quality, patient feedback collection, medical record-keeping system, etc., were there. Clinical protocols and clinical criteria were initiated in these hospitals, ensuring safe care. 10.5% of patient complaints were due to clinical outcome not as per their satisfaction. | Staff behaviour was more respectful in full accredited hospital as compared to entry level or non-accredited hospitals. The crowd management, information on patient rights etc. was seen in fully accredited hospitals as compared to other two categories. 9.5% of the patients reported complaints related to empathy issues. | With 47% of the patients reported OOPE due to diagnosis, post-operative treatment, blood, specialist consultation from outside, and medicine to be bought outside the hospital. | Not Mentioned |
| 28 | Saxena A, Trivedi M, Shroff ZC, Sharma M. 2022 [46] | Madhya Pradesh & Gujarat | To understand how hospital-based processes for managing transactions under PM-JAY (a government-sponsored health insurance scheme) are implemented and how they can be improved to strengthen the scheme’s operation. | Cross-sectional study |  | 53 respondents across 14 hospitals in Gujarat and Madhya Pradesh | PM-JAY | In Gujarat, hospitals reported that pre-authorization approvals typically take 3–4 hours, while private hospitals in Madhya Pradesh (MP) experienced much longer waits (up to 24 hours). The multiple queries raised by insurers for approval of pre-authorisation request are not always aligned with clinical protocols and lead to delay in initiating the treatment. Public hospitals in both states begin treatment before approval, whereas private hospitals usually wait for authorization, making them more vulnerable to administrative delays. The system of telephonic pre-authorisation in case of emergency cases was not found in two states, but it did not lead to delay in treatment as PM-JAY allows registering the patient within five days of admission | Not Mentioned | Not Mentioned | In Gujarat the treatment is delayed because the patients are asked to have the PM-JAY Card which is issued in public hospital, so they have to go there and then to private hospital for treatment. Patients often had to pay due to package restrictions in private hospitals in MP especially for multimodal treatment which they were not informed earlier; poor grievance systems and documentation transparency. | WhatsApp and internal systems enhanced workflows by reducing patient movement and improved efficiency of the work. Lack of document prompts in TMS led to missed information; delayed or unclear insurer queries causing delay in claim settlement. One hospital in MP has developed a software to address this challenge and improve efficiency. Also, Arogya Mitras with Medical/Paramedical background leads to better operational efficiency. | Not Mentioned |
| 29 | Gruber J, Sachdeva S, Aggarwal, Agrawal R, Patil P. 2022 [47] | Multiple states | To assess the impact of PM-JAY on inpatient out-of-pocket expenditures (OOPE) among eligible populations. | Policy Brief | NSS and PM-JAY claims data | 113,823 households (NSS data) | PM-JAY | Not Mentioned | Not Mentioned | Not Mentioned | Not Mentioned | The OOPE reduced among the eligible households as PM-JAY covered almost 90% of the medical costs. | The PM-JAY covers 90% of the hospitalisation cost among the enrolled beneficiaries. PM-JAY reduces the consumption expenditure on medical expenses from 16% to 10% among the SECC eligible households. |
| 30 | Chandrashekar S, Sehgal PK, Khurana R, Naib, P, Bhokare S, et al. 2022 [48] | Multiple states | To study palliative care under AB PM-JAY with a focus on utilization and best practices, especially from Kerala | Cross-sectional study | AB PM-JAY Oncology related data from the time the scheme was rolled out till 1st March 2020. | Claims Data from 12,044 hospitals empanelled with AB PM-JAY for the data study period. | PM-JAY | Portability rates were higher for oncology cases demonstrating that patients opted for portability due to longer waits and treatment delays in their home state. On average, going out-of-state reduced wait times by ~10 days and cut treatment initiation delays by ~4 days. | Not Mentioned | Not Mentioned | Not Mentioned | The portability rate is 2.46% for oncology cases as compared to 0.68% in overall percentage of portability. MP, UP and Bihar has maximum portability percentage, and the cases go to Maharashtra, Gujarat, Uttarakhan, UP and National healthcare providers (NHCPs). The higher portability in oncology cases lead to higher dropouts and higher additional costs due to travel and stay expenses, loss of wages. Even low awareness of Railways scheme of free tickets to cancer patients can also be one of the other reasons for higher OOPE. | The higher portability is also a reflective of inequitable distribution of quality of palliative care across the country. Top 10 private hospitals providing palliative care are majorly from Maharashtra and Gujarat while top-10 public hospitals are from Maharashtra, Gujarat, Chhattisgarh, Tripura, Uttarakhand and Uttar Pradesh. |
| 31 | Furtado KM, Raza A, Mathur D, Vaz N, Agrawal R, Shroff ZC. 2022 [49] | Uttar Pradesh and Jharkhand | To compare the trust and insurance models of healthcare purchasing under PM-JAY in terms of provider contracting, claim management, and implementation costs. | Case Study | Mixed Methods Case Study | Quantitative: 59,468 claims (UP), 100,260 claims (JH); Qualitative: 48 interviews in UP, 34 in JH | PM-JAY | A higher proportion of delays in pre-authorization and claim payments were higher in Jharkhand (45.7% and 44.7%) and Uttar Pradesh (33.7% and 52.5%), though median processing times remained within state limits. Differences in claim management (trust vs insurance model) influenced processing times and claim outcomes, affecting service delivery efficiency. | A key challenge in PM-JAY implementation is ensuring the appropriateness of the line of treatment. Very few quality-accredited hospitals were empaneled, limiting effectiveness in delivering high-standard care. | Not Mentioned | Not Mentioned | A higher proportion of delays in pre-authorization and claim payments were higher in Jharkhand (45.7% and 44.7%) and Uttar Pradesh (33.7% and 52.5%), though median processing times remained within state limits. Differences in claim management (trust vs insurance model) influenced processing times and claim outcomes, affecting service delivery efficiency. | Not Mentioned |
| 32 | Garg S, Bebarta KK, Tripathi N. 2022 [50] | Multiple states | To assess the effectiveness of publicly funded health insurance (PFHI) in providing financial protection to the elderly from hospitalisation-related out-of-pocket expenditure (OOPE) and catastrophic health expenditure (CHE). | Cross-sectional Study | LASI Wave 1 | 72250 | Publicly Funded Health Insurance (PFHI), including PM-JAY | Not Mentioned | Not Mentioned | Not Mentioned | Not Mentioned | Of the hospitalizations of the selected elderly population, 35% was in the public hospitals. The mean OOPE in public hospital was INR 8276 as compared to INR 49700 in private hospitals. The CHE was higher in private hospitals as compared to public hospitals. The PFHIs were found to have lacked efficiency in catering to financial protection to the elderly population because of ongoing overreliance on unregulated private sector. | PFHI failed to provide adequate financial protection to poorest quintiles, vulnerable elderly populations from catastrophic expenditure. The study highlighted poor utilization of public healthcare facilities among the poorest quintiles. |
| 33 | Garg S, Tripathi N, Bebarta KK. 2023 [51] | Multiple states | To evaluate the effectiveness of publicly funded health insurance (PFHI), including PMJAY, in reducing OOPE and distress financing for institutional deliveries in India. | Cross-sectional Study | NFHS-5 (2019-21) data | 42,978 institutional deliveries (10,427 caesarean, 32,551 non-caesarean) | PM-JAY | Not Mentioned | Not Mentioned | Not Mentioned | Not Mentioned | The higher OOPE in case of caesarean deliveries as compared to non-caesarean deliveries was observed. It was also high in private hospitals as compared to public hospitals (Five times than public hospitals). The incidence of distress financing was higher in private hospitals as compared to public hospitals, but there was no difference in those uninsured and those insured via PFHI. | Not Mentioned |
| 34 | Prinja S, Singh MP, Aggarwal V, Rajsekar K, Gedam P, Goyal A, et al. 2023 [52] | India | To evaluate the extent to which the district hospitals in India have benefitted from a financing perspective. | Cross-sectional Study | Costing of Health Services in India data |  | PM-JAY | Not Mentioned | Not Mentioned | Not Mentioned | Not Mentioned | The study concludes that demand-side financing mechanisms can be used to strengthen the public sector which represented improved efficiency of public health care utilisation. | Under PM-JAY, the public sector accounts for 11% of total claims by number but 35% by claim value, with state-wise variation: Tripura has the highest public claim share (97.8%) while Tamil Nadu has the lowest (3.1%), and in payouts, Arunachal Pradesh leads (95.9%) while Jharkhand is lowest (10.9%). Similarly, Public-sector utilization is strongest in general medicine (38% of claims) and minimal at the PHC/CHC level (0.005%), with district hospitals delivering 71.4% of general medicine procedures and 15.4% of obstetrics & gynaecology secondary care under PM-JAY. |
| 35 | Sharma SK, Joseph J, D HS, Nambiar D. 2023 [53] | Kerala | To assess inequalities in health insurance coverage and OOPE for hospitalization in Kerala. | Cross-sectional Study |  | 13,054 (3,234 households) | RSBY/CHIS/AB-PMJAY/KASP), Central Government Health Insurance Schemes (CGHS,ESIS,ECHS etc.), State Government Health Insurance scheme for employees (MEDISEP), community health insurance, health insurance provided by a micro finance institution, health insurance provided by private employer, private health insurance, or others). | Health insurance portability under PM-JAY lets patients access care seamlessly across empanelled hospitals—over 125,000 portable treatments have been used, with 70% of patients citing lack of local facilities as their reason to travel. This flexibility has reduced delays in receiving care—swift pre-authorizations and quick transfers ensure beneficiaries can get timely treatment without being confined by state borders. | Not Mentioned | Not Mentioned | Not Mentioned | Median OOPE at private facilities was lower for insured (INR 9000) than uninsured (INR 10500). Among PFHIS beneficiaries, males incurred higher OOPE than females, whereas the reverse was true for the uninsured. Married individuals, OBCs, Muslims, and the richest quintile had higher OOPE even under PFHIS. SC groups reported zero OOPE regardless of coverage. Among the uninsured, Christians and other religions had the highest OOPE. Wealthier uninsured groups often exceeded the PFHIS threshold of INR 4600, reflecting inequities in financial protection. Prior hospitalisation increased the likelihood of PFHIS coverage (AOR: 1.22). | PFHIS coverage declined from the poorest (57.5%) to the richest (37%) wealth quintile. The PFHIs coverage was seen to be having highest odds among the poorest as compared to the richest. SC groups had the highest PFHIS coverage (60.7%, AOR: 1.29), while ST and OBC groups had lower odds. Coverage was highest among Hindus (53.7%), while Muslims (AOR: 0.76) and Christians/others (AOR: 0.65) had significantly lower odds. Among the insured respondents, the OOPE was higher in males than females, married individuals, OBCs, Muslims and richest quintile of the respondents. The hospitalisations were also highest among the poorest followed by poorer and middle wealth quintile, indicating access to health services among the disadvantaged group. |
| 36 | Parmar D, Strupat C, Srivastava S, Brenner S, Parisi D, et al. 2023 [54] | Bihar, Chhattisgarh, Gujarat, Meghalaya, Tamil Nadu, and Uttar Pradesh | To identify whether PM-JAY enrolment is associated with increased hospitalizations and reduced OOPE and CHE, and compares these outcomes across public and private providers. | Cross-sectional Study |  | 53,486 individuals and 11,618 households) For the OOPE analysis, individuals from both the random and the claims sample who had incurred a hospitalization in prior 12 months (4,047 individuals and 3,411 households). | PM-JAY | Not Mentioned | Not Mentioned | Not Mentioned | The study found that patients had significant OOPE and that patient satisfaction levels were moderate with calls to extend the scheme to cover outpatient care. | The findings show that out-of-pocket expenditure (OOPE) under PM-JAY averaged ₹12,399, with patients spending more in private hospitals (₹15,919) than in public ones (₹7,216). About 37% of patients faced catastrophic health expenditure (CHE), with the burden heavier in private settings (45%) than in public facilities (26%). While PM-JAY didn’t significantly change OOPE in public hospitals, it reduced OOPE by ₹2,574 (17%) and lowered CHE by 8 percentage points (19%) in private hospitals. PM-JAY has improved financial protection primarily in private hospitalizations, while its impact in public facilities remains limited. | Given India's mix of public and private providers, PM‑JAY helped expand access to secondary and tertiary care, particularly in private hospitals where OOPE and catastrophic expenditures are several times higher, but also successfully reduced financial burden and CHE for enrolled households. Notably, high-end surgical treatments like knee replacements and CABG were mainly accessed in private facilities, while medical cases like fever and GI issues were treated in public hospitals. |
| 37 | National Health Authority, Report of CAG. 2023 [55] | NA | To examine the status of various activities required to be carried out by the  National Health Authority, State Health Authorities, District Implementing Units, etc. for  implementation of PMJAY and make suitable recommendations for augmenting  implementation at various levels. | Cross-sectional Study | Performance Audit |  | PM-JAY | The system of telephonic pre-authorisation in case of emergency cases was not found in almost all states, but it did not led to delay in treatment as PM-JAY allows registering the patient within five days of admission, showcasing the adaptive flexibility allowing for timely access. Also, delay in pre-authorisation approval results in delaying of treatment | Not Mentioned | Not Mentioned | A well-established grievance redressal system and calling of patients after the procedures allows patient centric treatments. | Weak financial controls were reported in four states where claims around INR 57.53 crore were booked under both medical and surgical procedure categories, reflecting double payment issues. | Not Mentioned |
| 38 | Mohanty SK, Upadhyay AK, Maiti S, Mishra RS, Kämpfen F et al. 2023 [56] | India | To compare changes in coverage in the PM-JAY imple- mentation period between socioeconomic groups and geographical locations with different exposures to the programme. | Cross-sectional Study | NFHS-4 (2015–2016) and NFHS-5 (2019–2021) | 601 509 and 636 699 in NFHS-4 (2015–2016) and NFHS-5 (2019–2021) | PM-JAY | Not Mentioned | Not Mentioned | Not Mentioned | Not Mentioned | Not Mentioned | The non-contributory public health insurance scheme coverage increased by 11.7% in rural areas as compared to 8% in urban areas. The increased coverage in rural areas led to decrease in pro-rich inequality. The geographical inequalities also decreased. The increase was not seen to becuase of the plausible effect of PM-JAY |
| 39 | Manna S, Singh D, Ghosal S, Rehman T, Kanungo S, Pati S. 2023 [57] | India | To estimate out-of-pocket expenditure (OOPE) for institutional deliveries in public and private sectors in India and examine associated factors. | Cross-sectional Study | National Family Health Survey, 2019–2021 (NFHS-5). | 145,386 mothers out of 724,115 women of reproductive age (aged 15 to 49 years), suitable for the analysis | Health Insurance in General including government funded health insurance schemes | Study found that health insurance was not sufficient for reducing OOPE at private facilities and that certain populations had significantly higher OOPE, for example women with lower levels of education, impacting access to needed care. | Not Mentioned | Not Mentioned | Not Mentioned | Median OOPE at private health facilities was higher for insured [median OOPE: Rs. 26,477], as compared to those who were uninsured [median OOPE: Rs.25434]. Also as seen in public health facilities, the median OOPE was Rs.1938 for insured mothers vs Rs.2067 for uninsured mothers. The median OOPE increases in case of emergency obstetric cases. | The OOPE was dependent on factors like mothers living in rural setup, education, ethnic group, wealth quintile and living in North-East region of India. |
| 40 | Garg, S, Bebarta, KK & Tripathi, N. 2024 [58] | Chhattisgarh | To evaluate the impact of AB-PMJAY on improving utilisation, quality, and financial protection for inpatient care after four years of its implementation. | Cross-sectional Study | Two waves of cross-sectional surveys in 2021 and 2022). | 15,000 individuals | PM-JAY | Not Mentioned | The average length of stay was more in PMJAY insured patients than uninsured patients. Also, the length of stay was more in private hospitals as compared to public hospitals. | Not Mentioned | The private hospitals contracted under the scheme continued to overcharge patients, and purchasing was ineffective in regulating provider behaviour. There was no difference in the satisfaction level of patients enrolled under the scheme and not enrolled under the scheme. | Enrolment under ABPMJAY was not associated with increased utilisation of inpatient care. The utilisation of private hospital was more in case of PMJAY enrolled cases and the catastrophic health expenditure also increased. It was seen that PMJAY had no effect on reducing OOPE or CHE. | Not Mentioned |
| 41 | Kamath S, Poojary M, Shetty H, Umesh K, Kar S, et al. 2024 [59] | Karnataka | To examines factors influencing OOPE in Karnataka’s Dakshina Kannada,Udupi, and Shimoga districts, investigating socioeconomic characteristics, healthcare infrastructure, and accessibility to inform policies for equitable healthcare access and reduced household financial strain. | Qualitative Study | Primary | 61 households were interviewed over a period of two weeks in January 2024 | Health insurance schemes | Government hospitals criticized for longer wait times. Private hospitals perceived to provide faster treatment and recovery. | Not Mentioned | The patients reported better treatment outcomes in the private hospitals as compared to public hospitals. | Private hospitals giver better treatment and are patient focused. The longer waiting times are disadvantage in government hospital. Patients preferred private hospital because of good quality of care and better treatment outcomes. | The respondents preferred government hospitals because of affordability and also because of free or subsidised care. The health insurance (whether government or private) helped reduce the OOPE. The medical and diagnostic procedures lead to increase in OOPE and non coverage of out-patient services in government health insurance schemes. Longer wait times, a shortage of doctors, worries about the quality of care, accessibility issues, and infrastructure restrictions were among the challenges that participants reported when obtaining government healthcare facilities. | Significant disparities were observed in healthcare-seeking behaviour, with lower-income households relying on government hospitals for affordability and free medications, while higher-income groups preferred private hospitals for better facilities and doctor choice. |
| 42 | Kanwal S et al. 2024 [60] | Himachal Pradesh | To assess the utility of AB-PMJAY in terms of reduction in CHE from before and after admission in a tertiary hospital in the northern state of India | Hospital-based cross-sectional study | Primary | 336 | PM-JAY | Not Mentioned | Not Mentioned | Not Mentioned | Not Mentioned | The study found the OOPE expenditure declined from 76.1% to 30%. The catastrophic health expenditure reduced by about 29%. | Not Mentioned |
