# Supplementary material
Source: Research Square preprint supplement (doi:10.21203/rs.3.rs-9880066/v1)
Supplement: Supplementary file 2 [file 817cd03cb7eae888c0030fe0.docx]

**Supplementary File II**

Table 1. Inclusion and exclusion criteria for selection of studies

|  | **Inclusion Criteria** | **Exclusion Criteria** |
| --- | --- | --- |
| P (Population): Patients covered under PMJAY scheme | Studies involving patients covered under PM-JAY or related publicly funded healthcare insurance schemes in India.  Studies assessing healthcare service utilization, experiences, or health outcomes of PM-JAY beneficiaries or related publicly funded healthcare insurance schemes in India. | Studies that focus on unrelated populations, such as patients covered by entirely different (non-Indian) healthcare schemes or private insured populations.  Studies targeting healthcare populations unrelated to PM-JAY or publicly funded healthcare insurance schemes in India, such as private employer-sponsored insurance schemes or non-beneficiary groups. |
| C(Concept): Quality of Care across six domains (timely access, effectiveness, safety, patient-centeredness, efficiency, and equity) | Studies addressing one or more of the six domains of quality of care: timely access, effectiveness, safety, patient-centeredness, efficiency, and equity.  Studies highlighting quality initiatives, challenges, strengths, and opportunities for improving PM-JAY services.  Empirical studies, reviews, or reports from reliable sources (e.g., government, peer-reviewed publications, gray literature). | Studies that lack explicit focus on any of the domains of quality of care under PM-JAY/publicly funded healthcare insurance schemes in India or focus only on unrelated aspects, such as program funding models or unrelated health policies.  Studies with unclear methodologies, anecdotal evidence, or speculative claims without data or systematic analysis. |
| C(Context): Tertiary Healthcare Facilities (Both Public and Private) providing care to patients under PMJAY | Studies on secondary and tertiary healthcare facilities, both public and private, empaneled under the PM-JAY scheme and/or publicly funded healthcare insurance schemes in India.  Studies evaluating hospital infrastructure, processes, service delivery, and outcomes under PM-JAY/publicly funded healthcare insurance schemes in India. | Studies focused exclusively on primary healthcare facilities, or those unrelated to healthcare delivery settings, such as policy-only studies. |
| Language | English | Other than English |
| Duration | 2014 to 2024 | Before 2014 and after 2024 |
