# Supplementary material
Source: Research Square preprint supplement (doi:10.21203/rs.3.rs-9880066/v1)
Supplement: Supplementary file 3 [file dffac684e8e5fc4f290d6256.docx]

**Supplementary File III**

Table 2: Mapping of Operational Definition in Screened Evidence against the IOM definition of six domains

| **Operational Definition** | **Mapped IOM Domain(s)** | **Reason for Inclusion** |
| --- | --- | --- |
| Effectiveness, Timely access, Patient Centeredness, Efficiency in processes like authentication, package selection, discharge, and claims | Effectiveness, Timeliness, Patient-Centeredness, Efficiency | Direct match with four IOM domains. |
| Satisfaction with hospitalization | Effectiveness, Patient-Centeredness | Patient experience is part of patient-centeredness and effectiveness. |
| Reduction in Out-of-Pocket (OOPE) expenditure | Efficiency | Financial protection overlaps with efficiency. |
| No difference in access/quality and OOPE by religion, caste etc. | Equity | Clear match to IOM’s equity domain. |
| Providing care respectful of patient values and guiding decisions | Patient-Centeredness | Direct match. |
| Access to services for BPL families | Equity, Timeliness | Access (timeliness) and fairness (equity). |
| Hospital use and mortality | Effectiveness, Safety | Mortality and use align with effectiveness and safety. |
| Length of stay | Effectiveness, Timeliness | Efficient and timely care. |
| Financial risk reduction, reduced borrowing | Efficiency, Patient-Centeredness | Financial security and responsive to patient needs. |
| Financial protection metrics: CHE thresholds, OOPE, willingness-to-pay | Efficiency | Efficiency in financial risk protection. |
| Quality of care: readmission, mortality | Safety, Effectiveness | Clear match to safety and effectiveness. |
| Adherence to standards (NABH, etc.) | Effectiveness, Safety | Standard adherence improves these domains. |
| Transparency in process | Patient-Centeredness | Respectful of patient engagement. |
| Financial loss due to health shocks | Efficiency and Equity | Reducing loss is efficient and effective care. |
