# Supplementary material
Source: Research Square preprint supplement (doi:10.21203/rs.3.rs-9880066/v1)
Supplement: Supplementary file 4 [file f4e54061626d88a4fe0e14b5.docx]

**Supplementary File I**

**Search Strategy for Data Collection and Extraction-**

PubMed search Strategy –

((Ayushman Bharat) OR (PMJAY)) OR (public health insurance)) OR (publicly funded insurance)) OR (Rashtriya Swasthya Bima Yojana)) OR (Pradhan Mantri Jan Arogya Yojana)) OR (Employees State Insurance Scheme)) OR (Chief Minister’s Comprehensive Health Insurance Scheme)) OR (PFHI)) OR (Arogyasri scheme)) OR (Mukhyamantri Amrutam Yojana)) AND (quality of care)) OR (healthcare quality)) OR (healthcare delivery)) OR ("timely access")) OR (effectiveness)) OR (efficiency)) OR (patient-centered)) OR (equity)) OR (safety)) OR ("out-of-pocket expenditure")) OR ("OOPE")) AND ("health facilities")) OR ("empaneled hospital")) OR ("healthcare facility")) OR ("private hospital")) OR ("Government hospital")) OR ("public hospital")) AND (India)

Google Scholar Search Strategy –

Ayushman Bharat OR PMJAY OR public health insurance OR publicly funded insurance OR Rashtriya Swasthya Bima Yojana OR Pradhan Mantri Jan Arogya Yojana OR Employees State Insurance Scheme OR Chief Ministers Comprehensive Health Insurance Scheme OR PFHI OR Arogyasri scheme OR Mukhyamantri Amrutam Yojana AND quality of care OR healthcare quality OR healthcare delivery OR timely access OR effectiveness OR efficiency OR patient-centered OR equity OR safety OR out-of-pocket expenditure OR OOPE AND health facilities OR empaneled hospital OR healthcare facility OR private hospital OR government hospital OR public hospital AND India

Epistemoikos Search Strategy –

PMJAY OR publicly funded insurance OR Rashtriya Swasthya Bima Yojana OR Pradhan Mantri Jan Arogya Yojana OR Chief Ministers Comprehensive Health Insurance Scheme OR PFHI OR Arogyasri scheme OR Mukhyamantri Amrutam Yojana AND quality of care OR healthcare quality OR healthcare delivery OR timely access OR effectiveness OR efficiency OR patient-centered OR equity OR safety OR out-of-pocket expenditure OR OOPE AND health facilities OR empaneled hospital OR healthcare facility OR private hospital OR government hospital OR public hospital AND India
